# Supplementary material for: Protective Effects of Currants (Vitis vinifera) on Corticolimbic Serotoninergic Alterations and Anxiety-like Comorbidity in a Rat Model of Parkinson’s Disease
Source: MDPI journal article supplement (doi:10.3390/ijms24010462), 2022-12-27
Supplement: s1 [file s1]

**Table S1:** Primary and Secondary antibodies used.

| Primary                   | Host   | Source                                           | Application | Dilution                 |
|---------------------------|--------|--------------------------------------------------|-------------|--------------------------|
| $\beta_2$ -AR<br>sc-81577 | Mouse  | Santa Cruz, Texas<br>U.S.A.                      | IHC         | 1:100(IHC)               |
| 5-HT<br>S5545             | Rabbit | Sigma Aldrich,<br>Deisenhofen,<br>Germany        | IHC<br>IF   | 1:700 (IHC)<br>1:400(IF) |
| SERT<br>sc-518084         | Mouse  | Santa Cruz                                       | IHC<br>IF   | 1:100 (IHC)<br>1:50(IF)  |
| BDNF<br>NB-100-98682      | Rabbit | Novus Biologicals<br>Englewood,<br>Colorado, USA | IF          | 1:300 (IF)               |
| <b>Secondary</b>          |        |                                                  |             |                          |
| Mouse IgG                 | Horse  | Vector<br>Laboratories,<br>Newark, CA, USA       | IHC         | 1:200                    |
| Rabbit IgG                | Horse  | Vector                                           | IHC         | R.T.U.                   |
| Mouse IgG-555             | Donkey | Molecular<br>probes, Leiden,<br>the Netherlands  | IF          | 1:400                    |
| Rabbit IgG-488            | Donkey | Molecular probes                                 | IF          | 1:400                    |

**Note:** To test the specificity of the primary antibodies used, additional negative controls were performed in adjacent sections, with the omission of the primary antibody or with application of secondary antisera mismatched for species. No labeling was observed in any case.

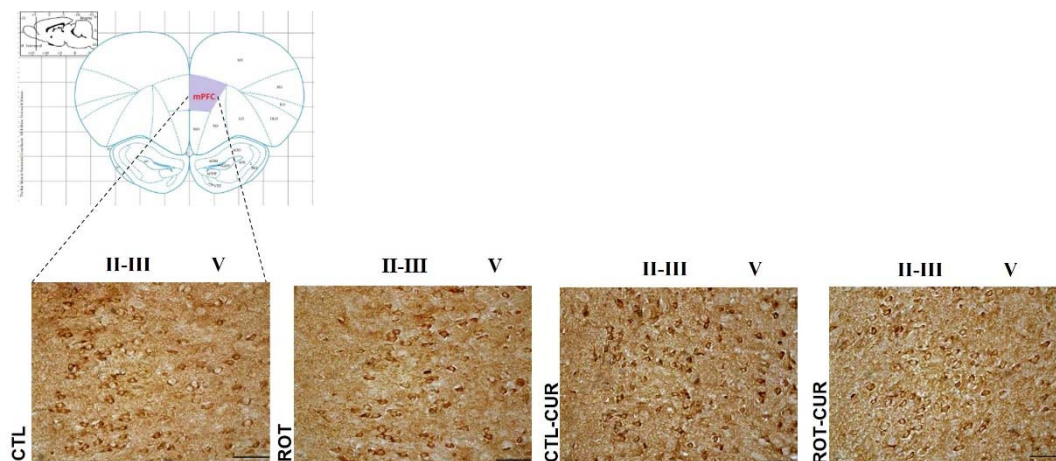

**Figure S1:** Representative microphotographs showing 5-HT immunostaining in mPFC at the coronal level indicated in the schematic diagram from Paxinos and Watson [24]

rat brain atlas, in a rotenone-induced PD model with or without currant consumption  
Scale bar=0.05mm.

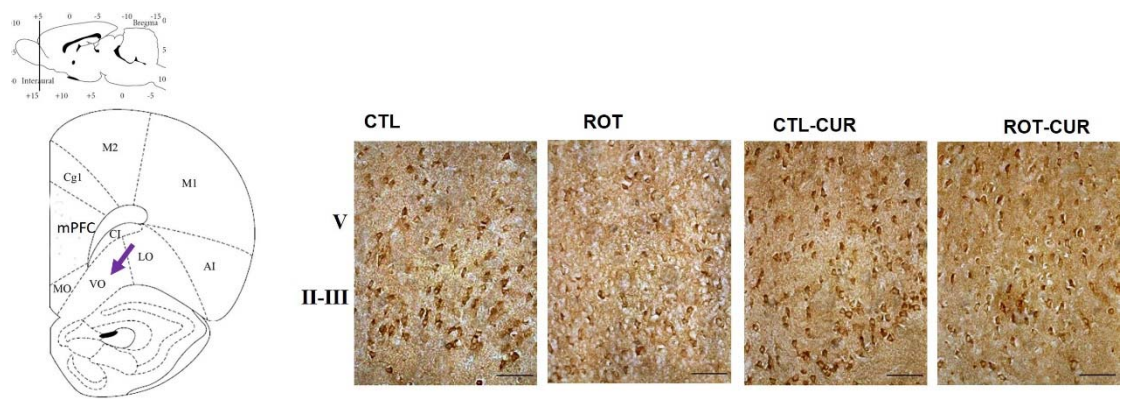

**Figure S2:** Representative microphotographs showing 5-HT immunostaining in vOFC sections at the coronal level of the vOFC (VO) indicated in the left (from Paxinos and Watson [24] rat brain atlas) in a rotenone-induced PD model with or without currant consumption Scale bar=0.05mm.

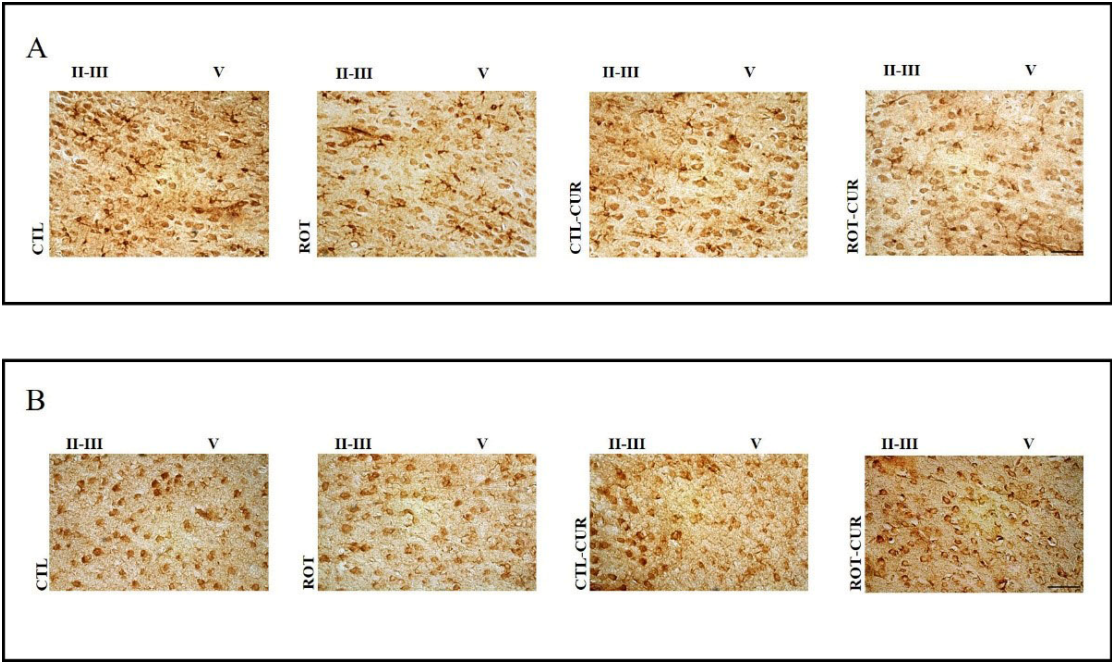

**Figure S3:** Representative microphotographs showing mPFC sections immunostained for (A) SERT and (B)  $\beta_2$ -ARs in a rotenone-induced PD model with or without currant consumption. Scale bar=0.05mm.
